# Supplementary material
Source: Springer Nature journal article supplement (https://www.springermedizin.de/resource/supplementary/12960_2011_311_MOESM2_ESM.pdf/9569782)

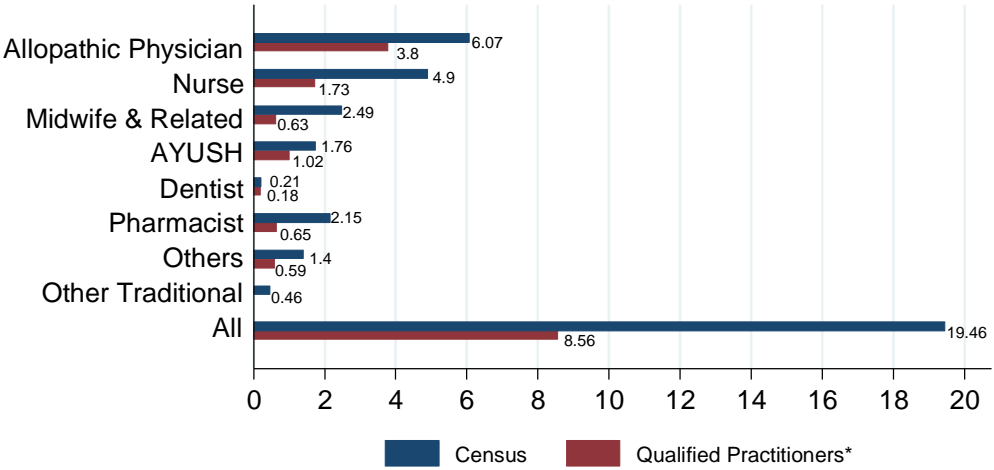

Supplement: MOESM2 [file 9569782]
